# Supplementary material for: Over-expression of oncigenic pesudogene DUXAP10 promotes cell proliferation and invasion by regulating LATS1 and β-catenin in gastric cancer
Source: J Exp Clin Cancer Res. 2018 Jan 27;37:13. doi: 10.1186/s13046-018-0684-8 (PMC5787324; doi:10.1186/s13046-018-0684-8)
Supplement: Supplementary file 2 — Pseudogenes profiling in gastric cancer from four GEO datasets. (XLSX 61 kb) [file 13046_2018_684_MOESM2_ESM.xlsx]

## Sheet: GSE54129
GName	logFC	pvalue	qvalue
RPL32P3	-4.86861	3.4e-22	8.93e-21	Table S2.The pseudogenes profiling in four GEO datasets.
KALP	-4.86861	3.4e-22	8.93e-21
AC010970.2	-4.21245	2.06e-29	1.38e-27
AKR1B10P2	-4.08655	2.94e-09	1.36e-08
SLC9A7P1	-3.62004	1.33e-16	1.65e-15
CTD-2026D20.3	-3.41064	5.86e-37	1.05e-34
RP5-886K2.1	-3.41064	5.86e-37	1.05e-34
RP11-346I3.2	-3.41064	5.86e-37	1.05e-34
HMGN2P46	-3.41064	5.86e-37	1.05e-34
SULT1D1P	-3.40257	3.74e-11	2.26e-10
AADACP1	-3.26594	8.34e-13	6.22e-12
USP9YP31	-3.20628	9.62e-75	1.05e-70
USP9YP36	-3.20628	9.62e-75	1.05e-70
RP11-151M7.1	-3.198	2.16e-14	1.99e-13
PGCP1	-3.1823	1.61e-05	4.24e-05
IARS2P1	-3.08762	1.67e-36	2.77e-34
GSTA7P	-2.95597	5.11e-10	2.63e-09
GSTA11P	-2.95597	5.11e-10	2.63e-09
GSTA12P	-2.95597	5.11e-10	2.63e-09
GSTA10P	-2.95597	5.11e-10	2.63e-09
RP11-780M14.1	-2.8429	7.47e-20	1.44e-18
RP13-977J11.5	-2.76793	1.75e-11	1.1e-10
REG1P	-2.65521	0.000129846	0.000296361
CYP2C56P	-2.64521	2.42e-16	2.91e-15
VTA1P1	-2.59166	2e-11	1.25e-10
AP003385.2	-2.55623	1.44e-43	6.16e-41
OR2A9P	-2.51701	1.94e-22	5.28e-21
OR2A20P	-2.51701	1.94e-22	5.28e-21
AKR1C6P	-2.51686	6.68e-17	8.65e-16
RCC2P6	-2.43722	5.71e-23	1.68e-21
ZNF702P	-2.43604	4.34e-34	5.35e-32
GOLGA2P1	-2.43502	2.67e-22	7.12e-21
GOLGA8UP	-2.43502	2.67e-22	7.12e-21
GOLGA2P9	-2.43502	2.67e-22	7.12e-21
OR5M13P	-2.4266	2.86e-14	2.6e-13
AP001187.11	-2.39196	5.66e-10	2.9e-09
OR13Z1P	-2.36067	1.57e-36	2.66e-34
SDHAP1	-2.35104	3.9e-31	3.29e-29
SDHAP2	-2.35104	3.9e-31	3.29e-29
RP11-87H9.2	-2.32944	1.24e-39	3.48e-37
RP11-804M7.1	-2.29377	4.48e-16	5.16e-15
AKR1C5P	-2.29132	3.52e-17	4.76e-16
DPY19L2P2	-2.28962	1.18e-44	5.72e-42
FLJ42102	-2.28962	1.18e-44	5.72e-42
AACSP1	-2.28962	1.18e-44	5.72e-42
PHKBP1	-2.27916	7.71e-18	1.14e-16
ANAPC1P1	-2.27501	8.03e-16	8.92e-15
FAM86FP	-2.25732	1.05e-09	5.2e-09
FAM86KP	-2.25732	1.05e-09	5.2e-09
RP11-139E19.2	-2.2326	4.13e-32	3.91e-30
CASP12	-2.20157	2.29e-22	6.16e-21
ABCC6P1	-2.19204	4.6e-31	3.85e-29
SDCBP2P1	-2.16098	4.09e-13	3.17e-12
WHAMML1	-2.15527	4.1e-23	1.23e-21
SLC25A6P6	-2.15527	4.1e-23	1.23e-21
FUCA1P1	-2.11861	1.5e-09	7.23e-09
RP11-253M7.3	-2.09321	9.02e-29	5.62e-27
CENPVP1	-2.07243	1.83e-17	2.57e-16
CENPVP3	-2.07243	1.83e-17	2.57e-16
CDC27P2	-2.05668	1.69e-54	2.57e-51
MST1L	-2.03221	4.37e-15	4.4e-14
RP11-195E2.1	-2.02286	3.22e-11	1.96e-10
HYDIN2	-2.01702	5.68e-28	3.22e-26
EIF3LP1	-2.0064	0.000288792	0.000621275
AGGF1P1	-1.99546	1.11e-51	1.22e-48
ECM1P1	-1.95648	6.36e-22	1.61e-20
DCAF13P1	-1.95575	6.55e-37	1.17e-34
NOS2P3	-1.95561	4.5e-25	1.75e-23
BCORP1	-1.93209	2.31e-35	3.34e-33
GOLGA8EP	-1.92763	4.36e-31	3.67e-29
GOLGA8CP	-1.92763	4.36e-31	3.67e-29
CTD-2547L16.3	-1.92538	3.81e-34	4.76e-32
GOLGA2P10	-1.91749	5.29e-32	4.96e-30
CSPG4P12	-1.91749	5.29e-32	4.96e-30
CSPG4P8	-1.91749	5.29e-32	4.96e-30
GOLGA2P7	-1.91749	5.29e-32	4.96e-30
AC083899.1	-1.90642	2.46e-26	1.14e-24
RP11-365F18.3	-1.90642	2.46e-26	1.14e-24
AC097359.2	-1.89339	7.2e-31	5.93e-29
OR7E148P	-1.87478	1.05e-12	7.76e-12
OR7E14P	-1.87478	1.05e-12	7.76e-12
OR7E43P	-1.87478	1.05e-12	7.76e-12
RP1-136J15.5	-1.85761	1.23e-14	1.17e-13
UGT1A12P	-1.84605	1.12e-09	5.51e-09
UGT1A13P	-1.84605	1.12e-09	5.51e-09
UGT1A11P	-1.84605	1.12e-09	5.51e-09
TUBBP1	-1.83117	1.01e-15	1.11e-14
NPAP1P3	-1.80398	2.65e-11	1.63e-10
RP11-486O13.5	-1.7806	1.37e-13	1.14e-12
TBC1D27	-1.73523	1.67e-35	2.45e-33
HSP90AB7P	-1.73523	1.67e-35	2.45e-33
RP11-29A2.1	-1.72229	2.96e-24	1.04e-22
ZNF37BP	-1.72229	1.95e-37	3.8e-35
WTAPP1	-1.72149	1.09e-21	2.67e-20
AP003068.18	-1.7161	2.92e-30	2.17e-28
FAAHP1	-1.70986	6e-11	3.51e-10
RP11-572H4.1	-1.70915	2.73e-23	8.38e-22
RP11-568K15.1	-1.69605	4.35e-30	3.16e-28
CCT4P1	-1.68972	4.35e-17	5.78e-16
KRT19P3	-1.68267	5.55e-05	0.000134438
KRT19P1	-1.68267	5.55e-05	0.000134438
RP11-30M20.1	-1.68074	1.79e-34	2.3e-32
RP5-947P14.2	-1.65778	1.09e-14	1.04e-13
PDPK2P	-1.62803	3.45e-08	1.37e-07
CCDC58P3	-1.61072	4.52e-17	5.99e-16
CCDC58P2	-1.61072	4.52e-17	5.99e-16
RP11-64C12.3	-1.61072	4.52e-17	5.99e-16
CCDC58P1	-1.61072	4.52e-17	5.99e-16
RP11-337C18.4	-1.58794	4.75e-11	2.82e-10
PDCD6IPP2	-1.57723	7.03e-34	8.47e-32
RP11-676J12.4	-1.57723	7.03e-34	8.47e-32
MYO5BP2	-1.57164	2.44e-08	9.93e-08
MYO5BP3	-1.57164	2.44e-08	9.93e-08
RP11-4L24.1	-1.57164	2.44e-08	9.93e-08
RP11-689E3.2	-1.57164	2.44e-08	9.93e-08
RP11-278C7.1	-1.56273	8.57e-16	9.5e-15
NAP1L1P2	-1.56273	8.57e-16	9.5e-15
CYP2B7P	-1.55734	2.86e-41	9.58e-39
SAR1P1	-1.55197	7.23e-19	1.22e-17
SAR1AP4	-1.55197	7.23e-19	1.22e-17
MARCKSL1P2	-1.54779	3.65e-10	1.92e-09
AC013474.4	-1.54616	3.43e-24	1.19e-22
RP11-322D14.1	-1.54469	2.56e-31	2.21e-29
RP11-368J21.3	-1.54469	2.56e-31	2.21e-29
RP11-443K8.1	-1.53385	7.15e-17	9.22e-16
RP11-483G21.3	-1.53385	7.15e-17	9.22e-16
NUDT16P1	-1.53314	2.34e-29	1.55e-27
RP11-75A9.1	-1.53252	1.76e-39	4.8e-37
EI24P2	-1.51282	2.76e-25	1.11e-23
ZNF204P	-1.50966	1.1e-16	1.38e-15
WASF4P	-1.50327	6.24e-36	9.81e-34
OSBPL9P2	-1.4845	9.59e-23	2.73e-21
ZNF826P	-1.48119	2.8e-22	7.41e-21
RP11-348H3.5	-1.47978	1.91e-29	1.28e-27
GNAQP1	-1.47977	7.86e-25	2.99e-23
KLF4P1	-1.47922	6.71e-09	2.97e-08
HMGB3P14	-1.47851	3.48e-16	4.08e-15
RP13-608F4.5	-1.47653	6.6e-19	1.12e-17
RP11-154D3.1	-1.47109	6.43e-10	3.27e-09
RP11-371E8.2	-1.46949	4.75e-21	1.07e-19
CYB5P4	-1.46949	4.75e-21	1.07e-19
CYP4F29P	-1.46896	1.08e-12	7.92e-12
CYP4F33P	-1.46896	1.08e-12	7.92e-12
SEC14L1P1	-1.46346	1.01e-29	7.04e-28
AC073465.1	-1.45668	2.49e-12	1.74e-11
NATP	-1.45097	5.61e-09	2.51e-08
RP11-1053O12.1	-1.45049	3.07e-21	7.08e-20
MTND2P16	-1.44133	6.8e-13	5.13e-12
AC114755.3	-1.43431	6.36e-42	2.27e-39
RP11-697E2.7	-1.43421	1.03e-07	3.8e-07
MTND5P16	-1.43091	0.0269058	0.0403786
PLGLA	-1.42635	5.54e-21	1.23e-19
RP11-427P5.3	-1.42209	1.09e-23	3.54e-22
TCEA1P2	-1.41348	1.07e-10	6.05e-10
RP11-419C5.2	-1.40258	3.95e-17	5.29e-16
NPIPB1P	-1.40258	3.95e-17	5.29e-16
CTB-134H23.2	-1.40258	3.95e-17	5.29e-16
HNRNPLP2	-1.39934	1.1e-12	8.08e-12
HNRNPLP1	-1.39934	1.1e-12	8.08e-12
CTD-3105H18.4	-1.39563	7.78e-19	1.31e-17
GGT8P	-1.3923	2.1e-16	2.55e-15
GGT3P	-1.3923	2.1e-16	2.55e-15
RP11-79D8.2	-1.39228	2.49e-17	3.43e-16
CIDECP	-1.39189	2.9e-25	1.16e-23
ABCC6P2	-1.38947	1.29e-08	5.45e-08
CYP4F9P	-1.38181	2.73e-16	3.26e-15
CYP4F24P	-1.38181	2.73e-16	3.26e-15
RP4-724P12.2	-1.36712	1.7e-21	4.05e-20
ZNF300P1	-1.36708	2.89e-26	1.32e-24
ME2P1	-1.35998	9.12e-20	1.73e-18
CTD-2206N4.4	-1.35784	4.1e-22	1.07e-20
LL0XNC01-131B10.2	-1.35604	1.19e-34	1.57e-32
TTC3P1	-1.35133	4.88e-26	2.15e-24
SPATA1	-1.34094	2.47e-14	2.26e-13
RP11-44F14.1	-1.34094	2.47e-14	2.26e-13
VENTXP4	-1.33686	3.83e-20	7.63e-19
TMCO5B	-1.33316	0.000272172	0.000587991
AC097463.1	-1.33037	2.31e-30	1.74e-28
RP11-819M15.2	-1.32206	2.36e-18	3.73e-17
AC009967.3	-1.3163	1.28e-20	2.72e-19
TUBB8P8	-1.31323	6.74e-15	6.63e-14
TUBBP5	-1.31323	6.74e-15	6.63e-14
AC010980.2	-1.30872	3.79e-19	6.63e-18
RP11-48B3.2	-1.30599	2.09e-13	1.69e-12
RP11-586E1.1	-1.3025	5.12e-20	1e-18
CCDC11P1	-1.30138	8.5e-32	7.79e-30
RP11-288H12.3	-1.30084	1.7e-23	5.34e-22
RP11-1174L13.2	-1.29983	3.46e-21	7.9e-20
RP5-961K14.2	-1.28815	1.11e-19	2.08e-18
AC073065.3	-1.28815	1.11e-19	2.08e-18
WHAMMP2	-1.28778	2.5e-22	6.68e-21
RP11-80F22.10	-1.28193	1.11e-29	7.67e-28
ZNF736P10Y	-1.28193	1.11e-29	7.67e-28
RP11-488L18.4	-1.28193	1.11e-29	7.67e-28
CTD-2561J22.2	-1.28193	1.11e-29	7.67e-28
RP11-147I3.1	-1.27906	3.85e-26	1.72e-24
CH507-42P11.1	-1.27553	1.02e-06	3.25e-06
AC090505.5	-1.2721	1.72e-16	2.11e-15
RP11-231P20.2	-1.27006	3.9e-24	1.34e-22
GNRHR2	-1.26389	2.68e-28	1.57e-26
HERC2P8	-1.26389	2.68e-28	1.57e-26
LPAL2	-1.26389	2.68e-28	1.57e-26
HERC2P5	-1.26389	2.68e-28	1.57e-26
RP11-927P21.5	-1.2624	1.25e-27	6.76e-26
RP1-152L7.5	-1.26153	3.23e-16	3.8e-15
PDCD5P2	-1.25932	6.56e-23	1.92e-21
PKD1L2	-1.25679	8.37e-26	3.57e-24
RP11-762H8.2	-1.25679	8.37e-26	3.57e-24
RP11-399K21.5	-1.24798	9.06e-26	3.84e-24
RP11-451J24.1	-1.24798	9.06e-26	3.84e-24
AC021451.1	-1.2468	3.69e-09	1.69e-08
RP4-816N1.1	-1.2413	1.33e-11	8.51e-11
RP11-25I9.3	-1.23897	6.02e-23	1.77e-21
HMGB1P47	-1.23388	1.71e-25	6.99e-24
FER1L4	-1.23325	4.25e-41	1.38e-38
RP11-383J24.2	-1.22878	9.76e-17	1.24e-15
AC092646.2	-1.2241	0.0137331	0.0218463
OR13I1P	-1.22246	1.76e-18	2.83e-17
PGGT1BP2	-1.22174	1.85e-15	1.96e-14
RP11-157G21.2	-1.21816	1.4e-21	3.37e-20
AC105342.1	-1.21313	1.95e-36	3.22e-34
AKR1B10P1	-1.20928	3.9e-24	1.34e-22
AC006116.22	-1.20923	4.98e-12	3.36e-11
PHC1P1	-1.2087	3.07e-28	1.79e-26
AC027612.4	-1.20592	3.15e-12	2.17e-11
RP11-341D18.5	-1.20592	3.15e-12	2.17e-11
CROCCP1	-1.20565	2.25e-22	6.06e-21
RP11-64D22.1	-1.19572	2.42e-08	9.85e-08
RP11-436P7.2	-1.1896	9.3e-17	1.18e-15
SEPT7P2	-1.17383	1.31e-20	2.78e-19
AC005176.2	-1.17383	1.31e-20	2.78e-19
AC069542.1	-1.17383	1.31e-20	2.78e-19
PPP4R1L	-1.17376	3.4e-26	1.53e-24
CTD-2179L22.1	-1.17047	1.35e-34	1.76e-32
RP11-266L9.1	-1.17047	1.35e-34	1.76e-32
ZNF876P	-1.16982	2.57e-14	2.35e-13
FMO8P	-1.16673	7.55e-21	1.66e-19
CTD-3030D20.1	-1.16587	3.63e-26	1.63e-24
GGNBP1	-1.16045	9.97e-18	1.45e-16
PDXDC2P	-1.16036	2.63e-27	1.37e-25
CHIAP2	-1.15748	8.58e-16	9.5e-15
EEF1GP6	-1.15643	4.01e-26	1.78e-24
AMYP1	-1.15535	4.74e-09	2.14e-08
RP11-34P1.1	-1.15352	1.97e-32	1.95e-30
ADAMTS7P4	-1.14078	1.56e-13	1.29e-12
CCNL2P1	-1.13833	1.78e-14	1.66e-13
TMEM198B	-1.13654	3.93e-26	1.76e-24
PIGFP1	-1.13596	1.2e-14	1.14e-13
PIGFP2	-1.13596	1.2e-14	1.14e-13
PIGFP3	-1.13596	1.2e-14	1.14e-13
GSTP1P1	-1.13466	5.21e-17	6.83e-16
CTD-3162L10.5	-1.13379	7.91e-13	5.9e-12
RP11-33B1.1	-1.13182	3.89e-14	3.47e-13
ZNF816-ZNF321P	-1.13147	7.77e-15	7.59e-14
COX17P1	-1.13083	1.41e-25	5.83e-24
FAM21EP	-1.12828	5.38e-22	1.38e-20
OSTF1P1	-1.12816	6.15e-20	1.2e-18
RP11-526D8.11	-1.12663	7.97e-19	1.34e-17
RP4-603I14.3	-1.12452	4.07e-06	1.18e-05
FOXO1B	-1.12077	6.85e-15	6.73e-14
CMB9-14B22.1	-1.11721	1.97e-17	2.75e-16
AP000568.2	-1.11497	6.3e-21	1.4e-19
RP4-800M22.2	-1.11296	1.51e-25	6.24e-24
RP11-136C24.1	-1.11194	3.58e-19	6.31e-18
MSNP1	-1.11138	2.33e-06	7.04e-06
RP11-237P21.1	-1.11123	4.42e-19	7.69e-18
RP11-118D22.3	-1.10891	3.95e-24	1.36e-22
DDTP1	-1.1011	2.27e-17	3.14e-16
RP11-403N16.5	-1.0977	4.93e-14	4.33e-13
RP11-341D18.2	-1.0977	4.93e-14	4.33e-13
ANKRD36BP1	-1.0977	4.93e-14	4.33e-13
SBDSP1	-1.09748	9.24e-16	1.02e-14
CTD-2006C1.6	-1.0959	4.68e-17	6.18e-16
CTC-499B15.4	-1.0959	4.68e-17	6.18e-16
CTC-499B15.1	-1.0959	4.68e-17	6.18e-16
PRDX2P2	-1.09563	2.14e-18	3.4e-17
ABCA17P	-1.09563	2.14e-18	3.4e-17
HSP90AA6P	-1.09365	4.74e-11	2.82e-10
CTD-2649C14.1	-1.09016	2.11e-12	1.49e-11
RP13-487C10.1	-1.08952	0.00094055	0.00185114
DOC2GP	-1.08772	0.00136554	0.00261454
RP11-61K20.1	-1.08435	2.35e-17	3.25e-16
RAB6C-AS1	-1.08428	1.07e-15	1.17e-14
RP11-726G23.8	-1.08257	2.13e-16	2.58e-15
USP9YP4	-1.08229	1.4e-33	1.6e-31
ACTBP13	-1.08229	1.4e-33	1.6e-31
RP11-74M13.4	-1.08152	1.65e-15	1.76e-14
YWHABP1	-1.08152	1.65e-15	1.76e-14
YWHABP2	-1.08152	1.65e-15	1.76e-14
AP002954.6	-1.07968	7.57e-21	1.66e-19
RP11-277I20.2	-1.07596	2.76e-13	2.19e-12
HTR7P1	-1.0746	4.4e-40	1.34e-37
AC015849.15	-1.0746	4.4e-40	1.34e-37
MRPS17P1	-1.0746	4.4e-40	1.34e-37
RP11-307A17.2	-1.07134	9.64e-16	1.06e-14
RP11-529A4.4	-1.07104	2.35e-21	5.49e-20
AC005077.12	-1.07039	8.6e-14	7.35e-13
AL590762.6	-1.06917	2.62e-24	9.27e-23
TDGF1P3	-1.06786	1.3e-05	3.49e-05
CBX3P5	-1.06757	6.35e-15	6.27e-14
RP11-185N2.1	-1.06251	4.89e-23	1.45e-21
PDZK1P2	-1.06233	0.00478275	0.00827626
EEF1A1P33	-1.06146	7.01e-12	4.65e-11
CRB3P1	-1.0607	1.8e-17	2.52e-16
RP3-407E4.3	-1.0607	1.8e-17	2.52e-16
CTD-2060C23.1	-1.05975	3.21e-18	4.99e-17
CTD-2620I22.2	-1.05975	3.21e-18	4.99e-17
RP11-397E7.4	-1.05975	3.21e-18	4.99e-17
SEC63P1	-1.05964	9.35e-16	1.03e-14
AC011742.3	-1.05602	5.46e-14	4.78e-13
RPL39P5	-1.0556	4.96e-12	3.35e-11
CTD-3141N22.1	-1.0556	4.96e-12	3.35e-11
CTD-2224J9.4	-1.0556	4.96e-12	3.35e-11
RP3-449O17.1	-1.04861	2.82e-26	1.29e-24
RP11-392L5.2	-1.04797	3.44e-14	3.09e-13
RP11-136I13.2	-1.04756	1.38e-12	9.96e-12
RP11-2L13.1	-1.04756	1.38e-12	9.96e-12
RP5-1158E12.2	-1.04416	0.000182795	0.000406967
AC005822.1	-1.04416	0.000182795	0.000406967
AP000593.5	-1.04395	8.47e-09	3.69e-08
RP11-392O18.2	-1.04177	5.63e-11	3.3e-10
AC115115.4	-1.04122	1.18e-36	2.03e-34
RP11-454F8.2	-1.04122	1.18e-36	2.03e-34
RP11-472I20.2	-1.03849	2.04e-07	7.26e-07
PHBP7	-1.03849	2.04e-07	7.26e-07
ZNF806	-1.03825	1.3e-14	1.23e-13
CTC-543D15.1	-1.03742	2.37e-20	4.85e-19
MRPS36P3	-1.0354	1.12e-21	2.73e-20
MRPS36P1	-1.0354	1.12e-21	2.73e-20
CTD-2651B20.4	-1.03244	3.1e-31	2.65e-29
AC006042.8	-1.03085	1.05e-16	1.32e-15
SRD5A3P1	-1.03052	3.79e-07	1.29e-06
RP11-93K7.1	-1.02751	0.000292819	0.000629344
RP11-164A6.1	-1.01875	9.21e-08	3.44e-07
RP11-467M13.3	-1.01875	9.21e-08	3.44e-07
AL050303.12	-1.016	3.12e-27	1.61e-25
TFAMP2	-1.01378	1.17e-15	1.27e-14
TFAMP1	-1.01378	1.17e-15	1.27e-14
AKR7A2P1	-1.0127	1.89e-18	3.03e-17
RP4-562J12.1	-1.0127	1.89e-18	3.03e-17
PRDX2P3	-1.0127	1.89e-18	3.03e-17
DDX18P5	-1.01154	4.47e-19	7.77e-18
CTC-463N11.1	-1.01154	4.47e-19	7.77e-18
RP11-528A10.2	-1.01154	4.47e-19	7.77e-18
RP11-196I18.2	-1.01016	1.08e-29	7.51e-28
CTD-2576D5.2	-1.0072	3.43e-16	4.02e-15
AF038458.4	-1.0072	3.43e-16	4.02e-15
RP3-378P9.1	-1.0072	3.43e-16	4.02e-15
HNRNPA1P50	-1.00703	1.19e-16	1.48e-15
E2F3P2	-1.0042	6.86e-15	6.74e-14
TRAV8-5	-1.00328	6.74e-24	2.24e-22
RP11-172C16.4	-1.00243	1.92e-13	1.56e-12
CTD-2320J21.1	-1.00163	6.88e-11	3.99e-10
HLA-V	1.00316	5.59e-24	1.89e-22
LARP4P	1.00387	9.07e-21	1.97e-19
PRKAR1AP	1.00599	8.63e-19	1.44e-17
AC010492.4	1.00995	5e-28	2.86e-26
RP6-60B16.1	1.01279	2.21e-16	2.67e-15
RP11-25C15.1	1.01293	2.29e-11	1.42e-10
AKIRIN1P2	1.01336	6.74e-21	1.49e-19
AC004837.3	1.01336	6.74e-21	1.49e-19
RP11-402P6.2	1.0135	3.89e-07	1.32e-06
RP11-402P6.5	1.0135	3.89e-07	1.32e-06
TRIM60P14	1.01695	2.66e-15	2.75e-14
RP11-366M4.11	1.01695	2.66e-15	2.75e-14
HSPB1P1	1.01737	1.59e-08	6.66e-08
HSPB1P2	1.01737	1.59e-08	6.66e-08
RP11-768G3.1	1.01983	1.61e-12	1.15e-11
ZNF101P1	1.01983	1.61e-12	1.15e-11
RLIMP1	1.02078	6.65e-13	5.03e-12
CTC-444N24.9	1.02197	3.83e-28	2.21e-26
NAPSB	1.02532	5.57e-06	1.59e-05
IPO8P1	1.02573	1.11e-08	4.74e-08
RP11-68D16.2	1.02945	2.12e-30	1.61e-28
RP11-266I3.1	1.02946	5.99e-07	1.97e-06
RP11-368J22.2	1.03076	2.74e-15	2.83e-14
RP11-33A14.3	1.034	3.02e-08	1.21e-07
SIRPAP1	1.04021	2.68e-26	1.23e-24
CSAG4	1.0422	0.000204666	0.000451761
CSAG2	1.0422	0.000204666	0.000451761
CSAG3	1.0422	0.000204666	0.000451761
METTL8P1	1.0431	1.31e-14	1.24e-13
CTD-2033A16.2	1.05371	5.94e-26	2.58e-24
NONOP2	1.05371	5.94e-26	2.58e-24
FOXN3P1	1.05383	1.08e-30	8.58e-29
ULK4P1	1.05419	6.96e-19	1.18e-17
RP11-382B18.3	1.05419	6.96e-19	1.18e-17
ULK4P2	1.05419	6.96e-19	1.18e-17
ULK4P3	1.05419	6.96e-19	1.18e-17
RP11-361A23.2	1.05545	3.25e-17	4.41e-16
STIP1P3	1.05587	3.69e-16	4.31e-15
RP3-467N11.2	1.05889	4.2e-30	3.06e-28
KRT18P35	1.06166	1.02e-07	3.8e-07
RP11-429P3.2	1.06326	2.09e-18	3.32e-17
PCDHGB9P	1.06467	5.96e-14	5.19e-13
PSAT1P1	1.06534	1.8e-07	6.45e-07
PSAT1P3	1.06534	1.8e-07	6.45e-07
PSAT1P4	1.06534	1.8e-07	6.45e-07
RP11-328C8.2	1.06926	3.39e-21	7.75e-20
CEP170P1	1.06928	2.04e-25	8.28e-24
HAUS1P2	1.07185	6.63e-28	3.71e-26
RP11-10G12.2	1.0723	6.13e-18	9.19e-17
RP1-121G13.3	1.07231	1.05e-17	1.52e-16
CXCR2P1	1.07335	2.05e-09	9.73e-09
TOX4P1	1.07549	1.74e-22	4.77e-21
RP13-228J13.9	1.07987	1.32e-10	7.36e-10
RP11-857B24.3	1.08262	6.68e-23	1.95e-21
RP11-626I20.1	1.08415	0.00191403	0.00356886
RP11-345J4.6	1.0875	9.62e-08	3.58e-07
CTD-2651B20.5	1.09535	3.2e-20	6.43e-19
IGLVI-38	1.10106	3.2e-21	7.34e-20
RP11-10E6.1	1.10205	1.62e-10	8.96e-10
COL11A2P1	1.10642	1.01e-08	4.34e-08
RP3-347M6.2	1.10706	8.54e-21	1.86e-19
TSSC2	1.10894	3.94e-26	1.76e-24
GBP1P1	1.11141	5e-07	1.67e-06
RP13-24G8.2	1.11693	8.85e-13	6.57e-12
CSDAP1	1.11807	1.11e-14	1.06e-13
RP11-609L23.3	1.11807	1.11e-14	1.06e-13
RP3-514P16.1	1.12346	1.45e-10	8.08e-10
NBPF13P	1.12495	3.68e-21	8.37e-20
NBPF25P	1.12495	3.68e-21	8.37e-20
NBPF17P	1.12495	3.68e-21	8.37e-20
NBPF8P	1.12495	3.68e-21	8.37e-20
RP11-66N5.2	1.12579	2.77e-20	5.62e-19
WARSP1	1.12819	1.61e-09	7.75e-09
RP11-1023L17.2	1.1286	2.73e-07	9.48e-07
RP11-470B22.1	1.1293	1.68e-06	5.19e-06
SCAND2P	1.13128	1.16e-19	2.18e-18
RP3-323B6.1	1.13284	7.18e-25	2.74e-23
AC006390.4	1.13603	7.72e-10	3.89e-09
AOX2P	1.13716	1.12e-24	4.15e-23
PRKY	1.13716	1.12e-24	4.15e-23
C6orf183	1.13716	1.12e-24	4.15e-23
ANKRD20A5P	1.13716	1.12e-24	4.15e-23
RP11-556I14.3	1.14317	4.08e-18	6.24e-17
ITGB1P1	1.14362	2.1e-13	1.7e-12
RP11-78H18.2	1.14625	4.21e-19	7.34e-18
RP11-90H3.1	1.14703	1.44e-15	1.55e-14
RP11-434J24.3	1.14893	4.92e-17	6.48e-16
GS1-309P15.4	1.15153	2.34e-11	1.45e-10
GS1-309P15.3	1.15153	2.34e-11	1.45e-10
RP11-23F23.3	1.15153	2.34e-11	1.45e-10
GYG1P2	1.15384	2.89e-18	4.52e-17
GYG1P3	1.15384	2.89e-18	4.52e-17
GYG1P1	1.15384	2.89e-18	4.52e-17
APOC1P1	1.15393	3.59e-12	2.46e-11
NAMPTP1	1.15423	5.56e-09	2.48e-08
RP11-197B12.1	1.15675	1.59e-26	7.55e-25
AC069213.1	1.15708	0.000967586	0.00189997
CLCN3P1	1.16037	1.35e-16	1.67e-15
RP11-473N11.2	1.16474	3.95e-18	6.06e-17
AC078899.1	1.16802	3.91e-17	5.24e-16
AP000357.4	1.16802	3.91e-17	5.24e-16
OR1X1P	1.16993	2.16e-10	1.17e-09
RP11-423H2.1	1.16993	2.16e-10	1.17e-09
OR1X5P	1.16993	2.16e-10	1.17e-09
RP11-91P24.3	1.17097	7.3e-10	3.69e-09
RP11-339B21.8	1.17255	6.18e-25	2.38e-23
CTC-471F3.5	1.17255	6.18e-25	2.38e-23
RBMS1P1	1.17515	2.9e-15	2.98e-14
CLUHP4	1.17641	6.21e-21	1.38e-19
RP11-299H22.3	1.18232	4.34e-09	1.97e-08
GSTM2P1	1.18356	1.67e-15	1.78e-14
RP11-698E18.1	1.18621	1.27e-26	6.04e-25
RP11-752G15.9	1.1864	1.85e-29	1.24e-27
RP11-39E3.4	1.18839	9.1e-10	4.54e-09
MYO15B	1.19299	1.09e-14	1.04e-13
FOXO3B	1.1945	1.66e-20	3.48e-19
RP11-598D12.1	1.19491	6.19e-05	0.000148724
CH17-472G23.2	1.20213	5.92e-14	5.15e-13
RCN1P2	1.20526	5.59e-27	2.8e-25
RRN3P2	1.20849	1.5e-15	1.61e-14
CTSLP8	1.20942	1.33e-21	3.21e-20
IGHV1OR15-3	1.21261	7.16e-09	3.15e-08
IGHV3-71	1.21261	7.16e-09	3.15e-08
AC008072.1	1.21636	1.6e-14	1.49e-13
RPS19P3	1.21757	1.79e-18	2.87e-17
CRHR1-IT1	1.22645	6.2e-27	3.09e-25
ARF1P1	1.22645	6.2e-27	3.09e-25
ARF4P3	1.22645	6.2e-27	3.09e-25
ARF1P2	1.22645	6.2e-27	3.09e-25
AFG3L1P	1.23347	1.18e-20	2.53e-19
TAS2R63P	1.23642	6.44e-22	1.63e-20
TAS2R15P	1.23642	6.44e-22	1.63e-20
TAS2R64P	1.23642	6.44e-22	1.63e-20
HLA-DQB3	1.24064	5.76e-08	2.22e-07
SGOL1P1	1.24438	0.00219315	0.00404515
PSG10P	1.24986	8.85e-23	2.54e-21
CTD-2384B9.1	1.24998	2.58e-40	7.98e-38
RP11-213O5.4	1.25071	4.57e-12	3.09e-11
ZSWIM5P3	1.25172	8.2e-24	2.69e-22
FCGR2C	1.25438	6.31e-16	7.13e-15
API5P1	1.25764	2e-34	2.56e-32
API5P2	1.25764	2e-34	2.56e-32
IGHVII-51-2	1.25998	0.000101929	0.000236624
RP11-140C5.3	1.26192	3.86e-08	1.52e-07
MTND5P31	1.26222	6.43e-09	2.85e-08
SERBP1P5	1.26518	1.53e-20	3.24e-19
ZNF736P3Y	1.26594	3.47e-13	2.72e-12
ZNF736P2Y	1.26594	3.47e-13	2.72e-12
ZNF736P1Y	1.26594	3.47e-13	2.72e-12
LGALS17A	1.26594	3.47e-13	2.72e-12
SDHDP1	1.26624	3.03e-15	3.11e-14
CTD-2158P22.4	1.26694	3.12e-10	1.65e-09
TUBAP2	1.26694	3.12e-10	1.65e-09
TUBA3FP	1.26694	3.12e-10	1.65e-09
RP11-209M4.1	1.27189	4.71e-34	5.77e-32
TCEAL4P1	1.27192	0.000883068	0.00174592
CDC42P2	1.27319	9.57e-08	3.57e-07
RP11-419M24.4	1.27319	9.57e-08	3.57e-07
CDC42P6	1.27319	9.57e-08	3.57e-07
CTNNAP1	1.27394	1.36e-14	1.28e-13
RP11-286H14.4	1.27435	9.54e-27	4.63e-25
RP11-745H7.1	1.2747	8.31e-06	2.3e-05
bP-21264C1.3	1.27569	9.95e-16	1.09e-14
DDX3P1	1.27571	2.94e-17	4.01e-16
DDX3P3	1.27571	2.94e-17	4.01e-16
RP11-129H15.1	1.28394	3.84e-12	2.62e-11
TXLNGY	1.28654	4.83e-21	1.08e-19
GOLGA8IP	1.28858	3.25e-23	9.85e-22
SNX18P3	1.28944	8.88e-11	5.07e-10
RPL30P11	1.29716	0.0010202	0.00199547
RNF216P1	1.29917	8.67e-24	2.84e-22
RP6-191P20.5	1.29998	2.57e-08	1.04e-07
SRGNP1	1.30206	1.01e-11	6.56e-11
RP11-139F9.1	1.30872	4.66e-14	4.11e-13
MAPRE1P1	1.31346	2.09e-31	1.82e-29
RP11-141P6.1	1.31346	2.09e-31	1.82e-29
HNF4GP1	1.32597	2.14e-11	1.33e-10
DGKZP1	1.32612	9e-17	1.15e-15
KIF28P	1.33104	6.83e-18	1.02e-16
RP11-215G15.4	1.33242	8.78e-13	6.52e-12
RP11-193H22.2	1.3332	1.96e-21	4.63e-20
RPL7L1P10	1.3332	1.96e-21	4.63e-20
RP11-712B9.4	1.3431	5.08e-19	8.78e-18
RP11-795A2.3	1.3431	5.08e-19	8.78e-18
CTD-2114J12.1	1.34487	1.48e-06	4.6e-06
EEF1A1P10	1.3481	0.000368891	0.00077791
PPP1R1AP1	1.35598	2.46e-05	6.31e-05
RP5-1041C10.3	1.36419	1.4e-35	2.07e-33
RP11-545A16.3	1.36714	1.58e-22	4.36e-21
AC068044.1	1.37049	4.89e-17	6.45e-16
RPL26P31	1.37727	3.58e-22	9.38e-21
TBL1YP1	1.38562	1.87e-11	1.17e-10
RP3-405J10.2	1.3996	5.46e-23	1.61e-21
FAM86EP	1.40114	2.61e-22	6.96e-21
FAM86JP	1.40114	2.61e-22	6.96e-21
FAM86C2P	1.40114	2.61e-22	6.96e-21
FAM86DP	1.40114	2.61e-22	6.96e-21
KRT8P32	1.40577	4.64e-21	1.04e-19
VIM2P	1.40577	4.64e-21	1.04e-19
SCML2P1	1.40938	7.98e-27	3.93e-25
SCML2P2	1.40938	7.98e-27	3.93e-25
IL6STP1	1.42338	7.25e-21	1.59e-19
OR5L1	1.42646	3.59e-38	8.05e-36
CH507-254M2.6	1.43225	2.88e-15	2.97e-14
CH507-145C22.2	1.43225	2.88e-15	2.97e-14
ANXA2P2	1.43225	2.88e-15	2.97e-14
RP4-736I12.1	1.43712	2.95e-18	4.61e-17
ZNF736P11Y	1.4403	4.48e-08	1.75e-07
ZNF736P4Y	1.4403	4.48e-08	1.75e-07
ZNF736P12Y	1.4403	4.48e-08	1.75e-07
RP11-313J2.1	1.46749	2.1e-17	2.92e-16
RP11-287F9.1	1.47916	8.78e-05	0.000205868
NANOGP1	1.48298	5.85e-20	1.14e-18
AC003973.1	1.49006	1.15e-33	1.33e-31
RP5-1004I9.2	1.51504	5.26e-27	2.64e-25
CTA-292E10.7	1.51504	5.26e-27	2.64e-25
GTF2IRD2P1	1.51561	3.63e-31	3.09e-29
GTF2IP3	1.51561	3.63e-31	3.09e-29
CRIP1P2	1.518	1.27e-16	1.59e-15
CRIP1P4	1.518	1.27e-16	1.59e-15
RP4-781L3.1	1.52366	7.41e-17	9.54e-16
RP11-109L13.1	1.53043	3.18e-09	1.47e-08
EEF1GP8	1.53177	4.91e-15	4.92e-14
PIP5K1P1	1.53496	4.31e-27	2.2e-25
PIP5K1P2	1.53496	4.31e-27	2.2e-25
PIPSL	1.53496	4.31e-27	2.2e-25
HSP90AB3P	1.53592	3.75e-19	6.58e-18
HSP90AB2P	1.53592	3.75e-19	6.58e-18
RP11-781E19.1	1.53592	3.75e-19	6.58e-18
RP5-1033H2.1	1.54531	7.23e-15	7.08e-14
TOMM20P3	1.56556	1.27e-17	1.83e-16
RP11-1166P10.8	1.56797	2.13e-21	5.02e-20
IGHV3-19	1.56797	2.13e-21	5.02e-20
IGHV3OR16-11	1.56797	2.13e-21	5.02e-20
CTD-2571E19.3	1.58171	6.83e-19	1.16e-17
RP11-560L11.1	1.58446	1.41e-29	9.58e-28
RP11-402K9.1	1.58446	1.41e-29	9.58e-28
AC097374.2	1.59145	2.24e-17	3.11e-16
bP-2171C21.2	1.59145	2.24e-17	3.11e-16
RHOQP3	1.60682	1.82e-20	3.82e-19
RHOQP2	1.60682	1.82e-20	3.82e-19
RHOQP1	1.60682	1.82e-20	3.82e-19
ICE2P2	1.61049	6.37e-32	5.92e-30
DPY19L2P1	1.61086	1.4e-19	2.6e-18
ZNF542P	1.61494	2.25e-18	3.57e-17
FBXW11P1	1.62084	3.09e-32	2.99e-30
GM2AP1	1.62445	9.3e-33	9.61e-31
EEF1B2P8	1.62622	3.95e-38	8.79e-36
AP1S2P1	1.63903	1.36e-13	1.13e-12
RP11-615J4.4	1.64964	2.01e-19	3.66e-18
GNAI2P1	1.65199	1.52e-39	4.2e-37
RP11-206P5.2	1.65395	7.03e-20	1.36e-18
SHC1P1	1.65846	3.83e-41	1.25e-38
SHC1P2	1.65846	3.83e-41	1.25e-38
RP11-2C24.5	1.66265	7.35e-24	2.43e-22
RP11-579D7.8	1.66265	7.35e-24	2.43e-22
PTBP1P	1.67064	5.15e-40	1.53e-37
RP11-175B9.2	1.67302	1.58e-36	2.66e-34
ZNF317P1	1.67583	7.35e-40	2.17e-37
RP11-20B24.3	1.67872	1.21e-37	2.45e-35
EIF5AP2	1.68128	3.72e-26	1.66e-24
NXT1P1	1.69517	1.22e-23	3.9e-22
FSCN1P1	1.70587	1.85e-14	1.72e-13
SLC2A3P1	1.70594	1.05e-14	1e-13
DNM1P51	1.71463	4.36e-18	6.64e-17
FADS2P1	1.72078	3.69e-21	8.4e-20
DHX9P1	1.73203	1.09e-31	9.89e-30
RP11-574M7.2	1.73203	1.09e-31	9.89e-30
OR6C72P	1.74086	5.58e-26	2.43e-24
CTD-2313D3.1	1.74933	1.78e-18	2.86e-17
RP1-209B5.2	1.76653	6.06e-22	1.54e-20
ABCF2P1	1.76877	2.5e-46	1.68e-43
ABCF2P2	1.76877	2.5e-46	1.68e-43
CTD-2017D15.1	1.77336	1.09e-37	2.24e-35
SOD2P1	1.78071	1.26e-12	9.15e-12
RP11-1166P10.1	1.78156	1.45e-39	4.05e-37
RP11-125H8.1	1.79122	7.33e-38	1.57e-35
RP1-3E10.2	1.80264	7.22e-18	1.07e-16
NDUFS5P4	1.81092	2.01e-12	1.42e-11
RP11-113D19.9	1.81156	1.56e-11	9.84e-11
CFL1P6	1.81391	4.19e-09	1.9e-08
RP11-365D9.1	1.82052	6.24e-22	1.58e-20
AC079780.3	1.82359	5.87e-18	8.81e-17
RP11-463C14.1	1.82359	5.87e-18	8.81e-17
RANBP20P	1.84845	1.19e-27	6.44e-26
AC018880.1	1.90121	7.77e-26	3.33e-24
CTD-2267D19.7	1.9244	4.12e-46	2.68e-43
AHCYP3	1.93898	6.84e-20	1.32e-18
CTD-2026G22.1	1.94391	6.71e-12	4.45e-11
GM2AP2	1.94576	1.37e-24	5.04e-23
AKR7L	1.96262	1.47e-39	4.08e-37
CRYBB2P1	1.97444	1.15e-23	3.69e-22
RP11-46D6.5	1.98656	5.44e-19	9.35e-18
RP11-380I10.3	1.98944	6.94e-18	1.03e-16
ANKRD20A10P	2.02392	2.28e-15	2.38e-14
CTD-3051L14.13	2.03207	1.12e-13	9.43e-13
CTC-327F10.1	2.05746	6.43e-16	7.25e-15
RP11-641A6.5	2.06559	2.75e-09	1.28e-08
GSTM5P1	2.08004	6.64e-21	1.47e-19
TNRC18P1	2.08961	5.72e-49	4.53e-46
AC007256.5	2.14332	5.63e-35	7.73e-33
RP11-215D10.1	2.15371	1.87e-76	2.56e-72
DDX39BP2	2.15371	1.87e-76	2.56e-72
DDX39BP1	2.15371	1.87e-76	2.56e-72
AC010468.3	2.16996	1.22e-30	9.57e-29
RP11-379K17.5	2.20772	2.24e-09	1.06e-08
CLIC4P3	2.21511	2.04e-29	1.36e-27
CLIC4P2	2.21511	2.04e-29	1.36e-27
CLIC4P1	2.21511	2.04e-29	1.36e-27
MLLT10P1	2.21735	1.03e-45	6.18e-43
MLLT10P2	2.21735	1.03e-45	6.18e-43
CDV3P1	2.2185	2.83e-38	6.5e-36
RP11-155G14.1	2.23707	4.31e-22	1.12e-20
CEP164P1	2.3015	2.02e-14	1.87e-13
FCGR1C	2.35304	4.85e-19	8.38e-18
GLYATL1P2	2.35371	9.72e-34	1.14e-31
TAF9BP1	2.37461	1.38e-25	5.75e-24
AC010975.2	2.40289	1.33e-45	7.69e-43
DUXAP10	2.42839	2.1e-16	2.55e-15
YES1P1	2.43555	1.14e-36	1.98e-34
CD46P1	2.48034	4.88e-32	4.58e-30
RP11-756G12.1	2.58218	5.74e-12	3.85e-11
AC098614.2	2.58218	5.74e-12	3.85e-11
TPM3P2	2.58218	5.74e-12	3.85e-11
GS1-44D20.1	2.58218	5.74e-12	3.85e-11
RP11-397A15.4	2.60118	6.59e-22	1.66e-20
PRSS29P	2.68899	1.84e-20	3.84e-19
GCSHP5	2.68899	1.84e-20	3.84e-19
RP13-228J13.6	2.70468	4.51e-46	2.9e-43
TWF1P1	2.70468	4.51e-46	2.9e-43
RP11-453D16.1	2.71193	3.31e-77	9.04e-73
TPSP2	2.72919	2.99e-20	6.03e-19
ANKRD36BP2	2.74715	1.44e-51	1.54e-48
EXOC5P1	2.7882	3.64e-56	6.86e-53
CTD-2025J6.1	2.84076	8.73e-38	1.84e-35
AC010240.2	2.87896	3.37e-15	3.44e-14
RP11-162K6.1	2.88631	3.1e-20	6.24e-19
RP11-1003J3.1	2.91541	1.45e-25	5.98e-24
RP11-211A18.1	2.9466	4.45e-50	4.19e-47
ATP5F1P4	2.97089	6.35e-22	1.61e-20
ADCY10P1	3.00616	9.26e-26	3.93e-24
RPL17P44	3.01938	2.31e-19	4.17e-18
RP11-40G16.1	3.01966	3.9e-31	3.29e-29
CSTP1	3.04055	3.8e-08	1.5e-07
XXyac-YX60D10.2	3.04055	3.8e-08	1.5e-07
RP11-738O11.9	3.0932	8.73e-33	9.07e-31
BANF1P1	3.12621	1.5e-87	8.2e-83
BANF1P4	3.12621	1.5e-87	8.2e-83
BANF1P3	3.12621	1.5e-87	8.2e-83
RP11-309L24.6	3.19678	4.73e-18	7.18e-17
RPS3AP32	3.29355	1.35e-44	6.43e-42
RP11-21G20.4	3.50883	2.54e-13	2.03e-12
RP11-815D16.1	4.46967	1.83e-24	6.62e-23
RP11-527L4.5	5.87694	1.32e-26	6.29e-25

## Sheet: GSE70880
GName	logFC	pvalue	qvalue
PGCP1	-3.16504	0.000116075	0.00137805
CH17-409J4.2	-2.35599	7.89e-05	0.0010566
CH17-228N4.2	-2.35599	7.89e-05	0.0010566
HIST2H2BA	-2.02291	3.63e-07	4.56e-05
MT1JP	-1.68867	2.33e-07	3.77e-05
OR9A1P	-1.4384	6.51e-10	1.22e-06
CTD-2328D6.1	-1.43535	5.45e-09	5.25e-06
AC006156.2	-1.39262	1.37e-05	0.000345332
TSPY7P	-1.39262	1.37e-05	0.000345332
MT1P3	-1.39137	1.09e-05	0.000300783
MT1XP1	-1.38105	7.26e-06	0.000239875
MT1L	-1.23855	1.28e-05	0.000332044
TRIM77BP	-1.18427	2.28e-07	3.77e-05
GSTM2P1	-1.16817	4.99e-06	0.000193621
SERPINA13P	-1.14972	2.61e-06	0.000131364
RP11-379K17.5	-1.12506	6.21e-05	0.000898629
ZNF815P	-1.11753	0.00596362	0.0235121
MST1L	-1.07834	2.23e-05	0.000464543
LRRC37A5P	-1.03837	6.64e-06	0.000229231
MTND4P12	-1.00876	2.06e-05	0.000443914
FCGR2C	1.00176	3.48e-05	0.000615339
RP11-23E10.4	1.00512	2.04e-07	3.54e-05
HMGA1P8	1.03986	2.31e-07	3.77e-05
CHEK2P2	1.04057	9.08e-08	2.47e-05
PTTG3P	1.04902	6.18e-06	0.000220086
RP11-295P22.3	1.05002	1.33e-07	3.07e-05
CHEK2P4	1.05002	1.33e-07	3.07e-05
RP11-564D11.3	1.05118	3.17e-05	0.000578997
ENO1P1	1.0581	1.47e-07	3.16e-05
FOLH1B	1.06641	0.00627425	0.0244082
TAAR3	1.07771	0.00994171	0.0344689
CTSLP8	1.08115	1.8e-06	0.00010858
HIST1H2APS6	1.08819	2.98e-05	0.000558716
C6orf183	1.08828	0.00810219	0.0295484
RAET1K	1.09593	0.00141976	0.00818166
HMGA1P3	1.14637	3.53e-09	3.86e-06
CYP2B7P	1.16022	0.00174048	0.00945986
FAR2P1	1.24146	0.000202986	0.00201668
CXCR2P1	1.25448	2.85e-05	0.000542097
RP11-307P22.1	1.28016	1.14e-06	8.28e-05
CTD-2027G2.1	1.47517	7.99e-07	6.74e-05
XXbac-B444P24.10	1.48518	0.00519834	0.0212057
RP11-536C10.10	1.65623	2.78e-07	4.01e-05
RP11-244H18.4	1.65623	2.78e-07	4.01e-05
NEK2P2	1.65623	2.78e-07	4.01e-05
RP11-536C10.26	1.65623	2.78e-07	4.01e-05
FAR2P4	1.66542	0.000552498	0.00406157
FAR2P2	1.70194	7.68e-05	0.00103886
MEP1AP4	1.8656	0.0141374	0.0448925
APOC1P1	1.88391	7.9e-07	6.71e-05
NEK2P4	1.88982	1.53e-06	9.78e-05
DUXAP10	2.24306	3.98e-07	4.76e-05
DUXAP8	2.24306	3.98e-07	4.76e-05

## Sheet: GSE79973
GName	logFC	pvalue	qvalue
CHIAP2	-5.70339	0.000956172	0.0475997
MT1JP	-4.92014	1.21e-05	0.019656
MT1XP1	-4.92014	1.21e-05	0.019656
MT1L	-4.92014	1.21e-05	0.019656
AGGF1P1	-3.84883	0.000152397	0.0314427
PNLIPRP2	-3.74749	0.000971496	0.047786
DDX10P2	-3.56718	2.13e-06	0.019656
RPL30P11	-3.44047	0.000151643	0.0314427
AKR1C6P	-3.44024	0.000453902	0.0398348
AKR1C5P	-3.44024	0.000453902	0.0398348
PRSS3P1	-3.0771	0.000116933	0.0301738
PRSS3P2	-3.0771	0.000116933	0.0301738
AZGP1P1	-2.91415	0.000130932	0.0303786
CYP2C56P	-2.89747	1.1e-05	0.019656
IGKV2D-18	-2.57943	0.000346226	0.0369321
IGKV7-3	-2.57943	0.000346226	0.0369321
IGKV2-18	-2.57943	0.000346226	0.0369321
CTA-125H2.3	-2.37163	0.000262447	0.0356366
CRYBB2P1	-2.3309	0.000366211	0.0375433
IGHVIII-2-1	-2.25871	0.00085411	0.0466045
IGHV3OR16-7	-2.25871	0.00085411	0.0466045
CYP4F24P	-2.14091	1.46e-05	0.019656
CYP4F9P	-2.14091	1.46e-05	0.019656
RP11-517B11.6	-2.14053	0.000734437	0.0448041
RP11-98C8.1	-2.04908	0.000959381	0.0475997
OR10D4P	-2.03991	1.95e-05	0.0222109
AP001187.11	-2.03276	0.000286536	0.0356366
RP11-260A9.1	-2.02664	0.000629234	0.0430036
ABCC13	-1.98021	4.95e-06	0.019656
ZNF37BP	-1.91951	0.000915237	0.0473949
ECEL1P2	-1.91161	0.000144637	0.0305551
RP1-136J15.5	-1.8892	7.75e-05	0.026046
MREGP1	-1.8562	0.00105843	0.0490522
TYRO3P	-1.83264	0.000876863	0.0466045
MST1L	-1.82013	0.000580123	0.0423474
RP3-406C18.2	-1.80604	0.00087722	0.0466045
NUDT16P1	-1.74146	5.63e-05	0.0246656
UBE2V2P3	-1.69242	0.000596992	0.0427232
SDCBP2P1	-1.58498	0.000496793	0.0406626
PKP4P1	-1.5798	8.56e-07	0.019656
ANKRD36BP2	-1.57588	0.000689589	0.0440974
CCDC144B	-1.57588	0.000689589	0.0440974
OR4A14P	-1.57588	0.000689589	0.0440974
RPL5P9	-1.55072	0.000856386	0.0466045
CTD-2194F4.2	-1.55072	0.000856386	0.0466045
RP11-15J10.8	-1.53975	0.000856	0.0466045
RP11-144O23.22	-1.53839	0.000442131	0.0392427
BMS1P4	-1.52804	0.000993007	0.0480816
IPO8P1	-1.52804	0.000993007	0.0480816
RP11-29A2.1	-1.50903	0.000489768	0.0405607
RP11-1277A3.2	-1.50861	5.88e-05	0.0250956
RP11-561C5.4	-1.47403	0.000945452	0.0475997
DNM1P51	-1.47403	0.000945452	0.0475997
OR5M13P	-1.44871	0.000820244	0.0464696
TXLNGY	-1.40668	0.000800275	0.0459612
NAP1L1P2	-1.40232	8.29e-06	0.019656
RP11-278C7.1	-1.40232	8.29e-06	0.019656
AZGP1P2	-1.38293	0.000830137	0.0466045
TMEM161BP1	-1.37525	6.1e-05	0.0254687
RP11-139E19.2	-1.36327	5.56e-05	0.0246656
FMO8P	-1.34629	0.000417201	0.0386618
RP11-337C18.4	-1.29896	0.000132653	0.0304191
RP11-10O17.1	-1.27993	0.000819514	0.0464696
RP11-308D16.2	-1.27993	0.000819514	0.0464696
DPY19L2P2	-1.27993	0.000819514	0.0464696
CTNNAP1	-1.26056	0.000154235	0.0317022
CTC-788C1.2	-1.25848	0.000130176	0.0303786
GPAA1P2	-1.24539	0.000175833	0.0329236
AC063976.7	-1.2307	0.000490328	0.0405607
RP11-676J12.4	-1.21627	0.000430759	0.0389224
RP11-524L6.2	-1.21601	3.29e-05	0.0225431
RP4-764D2.1	-1.21601	3.29e-05	0.0225431
RP11-5N19.3	-1.21577	0.00020801	0.0353214
RP11-371E8.2	-1.18131	2.65e-05	0.0225431
AC009967.3	-1.18131	2.65e-05	0.0225431
CYB5P4	-1.18131	2.65e-05	0.0225431
HBBP1	-1.16668	0.000405853	0.0383785
CSPG4P12	-1.1283	0.000234561	0.0356366
CSPG4P8	-1.1283	0.000234561	0.0356366
GOLGA2P7	-1.1283	0.000234561	0.0356366
RP13-608F4.5	-1.1283	0.000234561	0.0356366
RP11-819M15.2	-1.12094	0.000246009	0.0356366
RP11-421K23.1	-1.11582	0.000570762	0.0418878
HNRNPA1P54	-1.11582	0.000570762	0.0418878
RP11-19N8.2	-1.08593	0.00108164	0.0492412
SLC25A6P6	-1.08154	0.000553084	0.0415923
SLC25A5P3	-1.08154	0.000553084	0.0415923
SLC25A5P8	-1.08154	0.000553084	0.0415923
SLC25A5P1	-1.08154	0.000553084	0.0415923
CTD-2089O24.2	-1.05192	7.35e-05	0.0259344
ADAM3A	-1.01942	0.00100206	0.0481016
RP11-72I18.1	-1.01042	0.000356913	0.037153
CTC-512J14.5	1.00303	0.000917205	0.0473949
MEMO1P3	1.04945	0.000585028	0.0424818
MEMO1P1	1.04945	0.000585028	0.0424818
RP3-352A20.1	1.04945	0.000585028	0.0424818
KRT8P2	1.0801	0.000975587	0.0478817
KRT8P40	1.0801	0.000975587	0.0478817
CLUHP3	1.09615	0.00054179	0.041578
RP11-368P15.2	1.115	0.000556085	0.0415923
RP11-417L14.1	1.12639	0.000971717	0.047786
RP13-104F24.1	1.12639	0.000971717	0.047786
AC097711.1	1.12639	0.000971717	0.047786
AC073310.4	1.12639	0.000971717	0.047786
ENO1P1	1.17085	0.00101344	0.0482402
HTR7P1	1.23751	0.000877963	0.0466045
RPS6P20	1.23751	0.000877963	0.0466045
KRT18P35	1.23849	0.000919466	0.0473949
FCGR1C	1.25458	0.000983164	0.0480006
RP11-568K15.1	1.26153	2.78e-05	0.0225431
RP11-307P22.1	1.28419	0.000611561	0.0430036
CTD-2158P22.4	1.29191	0.000939846	0.0474917
TUBAP2	1.29191	0.000939846	0.0474917
TUBA3FP	1.29191	0.000939846	0.0474917
RP1-76C18.1	1.30067	0.000179719	0.0335363
NDUFS5P4	1.30067	0.000179719	0.0335363
CTC-444N24.9	1.30954	0.000463864	0.039944
TRPC2	1.56496	0.000186674	0.0337844
TPM3P2	1.56536	0.000534301	0.0414256
RP11-756G12.1	1.56536	0.000534301	0.0414256
FADS2P1	1.56943	0.000540283	0.041578
CABYRP1	1.65011	0.00103608	0.0486666
RP11-46D6.5	1.66106	3.61e-05	0.0225431
NBR2	1.69228	0.00014269	0.0304505
RP11-1003J3.1	1.73612	0.000229497	0.0356366
RP11-318E3.4	1.76262	0.00100715	0.0482402
RP11-166O4.1	1.77263	0.000652459	0.0431803
RP11-162K6.1	1.84312	6.49e-05	0.0256405
RP11-139F9.1	1.86438	5.58e-06	0.019656
PCDHB17P	1.89921	9.19e-05	0.0270744
PCDHB18P	1.89921	9.19e-05	0.0270744
PCDHB19P	1.89921	9.19e-05	0.0270744
OR5BB1P	1.89929	0.00081832	0.0464607
NSUN5P1	1.936	0.000570562	0.0418878
RPL17P44	1.96771	0.000409231	0.0383785
AC011242.6	1.99718	0.000999559	0.0481016
RP11-397A15.4	2.1811	0.000709997	0.0442961
ADCY10P1	2.37087	0.000242535	0.0356366
APOC1P1	2.50846	0.000611663	0.0430036
AC005077.12	2.62274	5.54e-05	0.0246656
DUXAP10	2.73911	4.06e-05	0.0231018
CTD-2026G22.1	3.52357	0.000677945	0.0437623
XXyac-YX60D10.2	3.56133	0.000293555	0.0356366
CSTP1	3.56133	0.000293555	0.0356366

## Sheet: GSE99416
GName	logFC	pvalue	qvalue
AC079776.2	-4.27926	5.37e-05	0.00435988
RP11-807H22.5	-4.17926	0.00148927	0.0237381
RP11-403I13.9	-3.92463	7.68e-06	0.00169477
ADAMTS7P4	-3.59327	0.00294269	0.0353626
RP11-111F5.5	-2.79548	0.000102194	0.00596821
GOLGA2P11	-2.76931	3.66e-05	0.00364047
GGTA1P	-2.66792	6.53e-05	0.00481597
RP11-17M15.2	-2.64232	0.000217301	0.00847128
RPLP0P2	-2.59002	1.71e-07	0.000286432
RP11-175I6.1	-2.53725	0.000151878	0.00717905
RP11-475I24.1	-2.53725	0.000151878	0.00717905
RP11-96J15.2	-2.53725	0.000151878	0.00717905
DEFB122	-2.47652	0.000307711	0.0100574
CCDC144B	-2.43634	2.33e-07	0.000298776
AC027612.6	-2.41613	0.00222979	0.0299528
AC027612.3	-2.33917	0.000739763	0.0159199
RPL30P11	-2.29889	2.01e-05	0.00272854
AMZ2P1	-2.19947	0.000371094	0.0110682
GVINP1	-2.16743	0.000725191	0.0157908
RP11-33B1.1	-2.16283	0.00149103	0.0237469
DBIL5P2	-2.16062	0.000393068	0.0114189
RRP7B	-2.13491	0.00199799	0.0280682
EEF1DP3	-2.12151	8.46e-07	0.000586815
FAM86JP	-1.93429	0.00025121	0.00915163
CCDC144CP	-1.91363	0.00337063	0.0382221
RP11-160C18.2	-1.85136	0.00309196	0.0364505
PI4KAP2	-1.82064	4.61e-05	0.00406214
ADAM3A	-1.74909	2.56e-05	0.00306599
RP11-693N9.2	-1.72045	0.00019972	0.00813461
DGKZP1	-1.70913	0.00163961	0.0250377
ZDHHC8P1	-1.68127	0.00115004	0.0204674
CD8BP	-1.66757	8.8e-05	0.00561788
ANKRD20A8P	-1.65832	0.00214344	0.0292395
AC002519.6	-1.65708	0.00163058	0.0249515
CRHR1-IT1	-1.65502	0.000335909	0.0105418
ACTG1P9	-1.5881	2.21e-07	0.000296187
AKR7L	-1.58069	0.00327417	0.0375473
RP11-848G14.2	-1.5799	0.00117082	0.0206317
RP11-497H16.7	-1.5799	0.00117082	0.0206317
AC093838.4	-1.50765	0.000138411	0.00686743
RP11-834C11.7	-1.48518	0.00282948	0.0345589
NCF1B	-1.43306	0.00284034	0.0346197
GLUD1P7	-1.43205	0.000564318	0.0137907
FAM96AP2	-1.42573	0.00521577	0.0497502
RP11-306I1.1	-1.42394	0.000132574	0.00670477
MTATP8P1	-1.40569	0.000192678	0.00802162
GOLGA6L17P	-1.40247	6.2e-05	0.00466829
PRKY	-1.39462	0.00213649	0.0291854
LINC00339	-1.34899	0.000376963	0.0111994
GOLGA2P2Y	-1.31768	0.00101159	0.0190319
CTD-2576F9.1	-1.30334	0.00100476	0.0189701
RP11-334J6.7	-1.29838	0.00050306	0.013038
TMEM198B	-1.29698	0.00310158	0.0365352
GOLGA8EP	-1.27591	9.3e-05	0.00579394
GOLGA8CP	-1.27591	9.3e-05	0.00579394
SPATA1	-1.26663	0.000787937	0.016493
OR6W1P	-1.25338	0.000288998	0.00976759
RP11-395L14.11	-1.24725	0.00249462	0.0320357
SSR4P1	-1.22869	0.000698008	0.01545
WHAMML1	-1.15672	0.000587084	0.0140386
RP11-12D5.5	-1.12755	0.00447405	0.0452844
RP5-857K21.6	-1.12635	0.00442792	0.0449766
ZNF37BP	-1.10871	0.00012789	0.00661257
RP11-196I18.3	-1.10703	0.000527083	0.0133112
RPL21P122	-1.1009	0.00148839	0.0237345
OR7E47P	-1.09261	0.00352115	0.0391605
RP11-677O4.4	-1.07828	0.00207081	0.0286596
RP11-113C12.4	-1.07416	0.000521828	0.0132523
CYMP	-1.06788	0.00397774	0.0421698
UBE2Q2P1	-1.06582	0.000223818	0.00861883
LINC00933	-1.06582	0.000223818	0.00861883
RP11-454P7.3	-1.03499	0.0044597	0.0451827
DPY19L2P2	-1.03008	0.00146472	0.0235313
CTD-3092A11.1	-1.02387	0.000983638	0.0186926
RP11-632K20.7	-1.02387	0.000983638	0.0186926
LINC00674	-1.00978	1.23e-05	0.00218422
RP11-61L23.2	-1.00197	0.0034452	0.0387693
RP11-676M6.1	1.00424	0.000109289	0.00619414
RP11-288G3.4	1.00878	0.00195195	0.0277376
RP11-1221G12.2	1.00942	0.00374386	0.0405522
RP11-737O24.3	1.01196	0.00308061	0.0363676
STAG3L4	1.02003	0.000165675	0.00747171
CLUHP3	1.0419	0.000255773	0.00921788
BMS1P8	1.04193	0.000134891	0.00677882
LINC01225	1.04459	0.00349805	0.039014
CTB-50E14.5	1.05731	8.45e-05	0.00550232
HERC2P3	1.06195	0.00138368	0.022731
OR2S2	1.06642	0.00310948	0.0365765
PDCD6IPP2	1.06769	6.92e-05	0.00492863
Z97634.3	1.09106	0.0012677	0.0216338
TCEB1P2	1.09505	4.36e-05	0.00396875
AOX2P	1.09857	0.00101318	0.0190496
AMYP1	1.10315	9.34e-05	0.00580605
POU5F1P4	1.11173	0.000469108	0.0125742
DDX11L10	1.11973	0.000504038	0.013038
DDX11L2	1.11973	0.000504038	0.013038
DDX11L9	1.11973	0.000504038	0.013038
DDX11L1	1.11973	0.000504038	0.013038
GOLGA2P7	1.12208	0.00232762	0.0307612
GLUD1P3	1.12807	0.00380459	0.0408931
CD99P1	1.13232	0.000434002	0.0121296
AP000354.4	1.16872	1.37e-05	0.00231334
ATF4P4	1.17882	7.11e-05	0.00502517
PPIAP19	1.18733	0.000719129	0.0157052
CTD-2311M21.2	1.18733	0.000719129	0.0157052
RP11-24M17.3	1.18733	0.000719129	0.0157052
AP000662.9	1.18733	0.000719129	0.0157052
LILRP2	1.21246	0.00513989	0.0494073
MBL1P	1.21654	0.000228409	0.00871305
HMGB3P22	1.22909	0.00198618	0.0279958
EGFEM1P	1.23725	0.00410159	0.0429065
LINC01347	1.23806	0.000256906	0.00922234
RSU1P2	1.26494	0.000814566	0.0167558
RP11-326A19.5	1.26689	0.00394337	0.0419185
KCTD9P1	1.26838	0.0050287	0.0487871
WASH6P	1.27049	0.000118806	0.00644224
WASH3P	1.27049	0.000118806	0.00644224
HERC2P2	1.29578	0.000728534	0.0158285
BMS1P2	1.30597	0.00178928	0.0263774
OR9A3P	1.30933	0.00158222	0.0245363
LGALS17A	1.31857	0.000111239	0.00623484
PRELID1P1	1.33427	0.000213691	0.00837486
AOC4P	1.34972	0.000553568	0.0136354
ZNF815P	1.35582	0.0022816	0.0303376
CCDC162P	1.37502	0.000116807	0.00639874
PI4KAP1	1.3946	0.000967086	0.0185258
RP11-561C5.4	1.41505	0.0026112	0.032891
DNM1P51	1.41505	0.0026112	0.032891
OR7E14P	1.41532	0.000169079	0.00756162
ESPNP	1.42092	0.000168011	0.00753673
TSSC2	1.42345	3.35e-05	0.00342748
OR2A9P	1.42868	9.79e-07	0.000641111
SSX9	1.43234	0.00376449	0.0406682
TPMTP1	1.48158	0.00296194	0.0354926
UBE2NL	1.48794	0.000169439	0.00756559
TCAM1P	1.50194	0.00132084	0.0221306
AC010980.2	1.54405	0.00196839	0.0278445
SDHAP1	1.55423	9.83e-05	0.0059091
RP13-104F24.1	1.57902	0.000231816	0.00876469
RP11-51L5.6	1.58063	0.00134905	0.0224059
RP11-480I12.5	1.58378	0.000334283	0.0105137
RP11-147I3.1	1.62124	0.00129733	0.0219275
RP11-423H2.1	1.6342	0.00144937	0.0233643
AC090286.2	1.65338	0.00178565	0.0263396
OR2A20P	1.67074	3.62e-06	0.00120385
SLC6A10P	1.67894	5.9e-05	0.00456181
RAC1P2	1.68572	0.000376619	0.0111949
TUBB2BP1	1.71328	7.76e-05	0.00526257
IMPA1P	1.85426	0.00124441	0.0213788
CCDC58P3	1.89412	0.00348148	0.0389476
CCDC58P1	1.89412	0.00348148	0.0389476
RPS11P6	1.90398	0.000711805	0.0156344
ADCY10P1	1.90645	0.000149151	0.00712177
KRT17P4	1.93323	2.3e-05	0.00289182
KRT17P5	1.93323	2.3e-05	0.00289182
AKR1C6P	1.95698	0.000760831	0.0161551
CTD-2583A14.11	2.05884	0.00223901	0.0300151
CTAGE14P	2.08365	8.18e-05	0.00542281
FAR2P1	2.09637	5.6e-07	0.000484422
MTMR9LP	2.10081	3.73e-05	0.00366047
DUXAP10	2.16227	0.00454945	0.0457694
CYP4F23P	2.18846	0.00199581	0.0280565
ZBTB45P1	2.30573	0.000264101	0.00936091
ZBTB45P2	2.30573	0.000264101	0.00936091
AFG3L1P	2.33306	3.68e-05	0.00364109
CYP4F62P	2.49883	1.4e-05	0.00234851
FAM86EP	2.57333	0.000572677	0.0138998
RP11-331F4.4	2.6584	3.29e-06	0.00117542
KRT8P12	2.77075	0.000156943	0.00729635
KRT19P2	2.79066	0.000201499	0.008163
HERC2P9	2.83674	7.46e-05	0.00517637
RP11-283C24.2	2.84647	5.33e-05	0.00434305
KRT18P27	3.02647	0.000243269	0.0090184
CYP4F30P	3.10914	0.000199466	0.00813246
ELMO2P1	3.20871	0.000246839	0.00908218
AADACP1	3.24981	7.83e-05	0.00528957
WTAPP1	3.36752	0.000544618	0.0135541
KRT18P55	3.37079	3.45e-05	0.00348717
RP11-697E2.7	3.39971	0.00358564	0.039521
FAR2P2	3.40426	1.6e-05	0.00248234
FAR2P3	3.50602	7.92e-05	0.00531888
KRT17P7	3.74905	0.000181267	0.00779369
NOS2P1	4.48448	0.000478778	0.0127008
NOS2P3	5.80706	0.00038254	0.0112757
